# Supplementary figures and images for: Wilms Tumor Gene (WT1) Peptide–based Cancer Vaccine Combined With Gemcitabine for Patients With Advanced Pancreatic Cancer
Source: PubMed Central journal article supplement — J Immunother. 2014 Feb 21;37(2):105–14. doi: 10.1097/CJI.0000000000000020 (PMC4229357; doi:10.1097/cji.0000000000000020), 2014-02-21

Supplemental Figure 2.

A

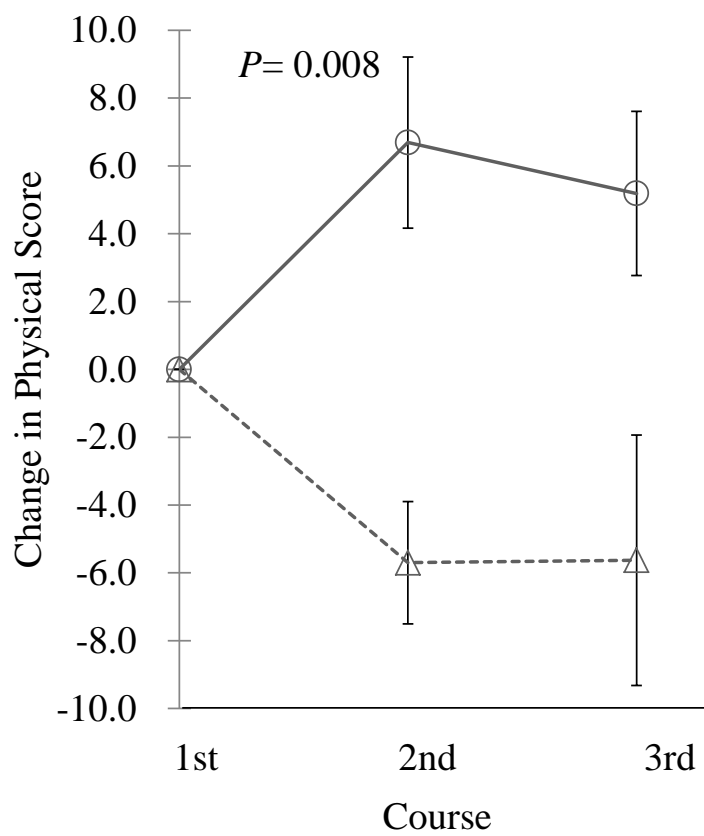

**B**

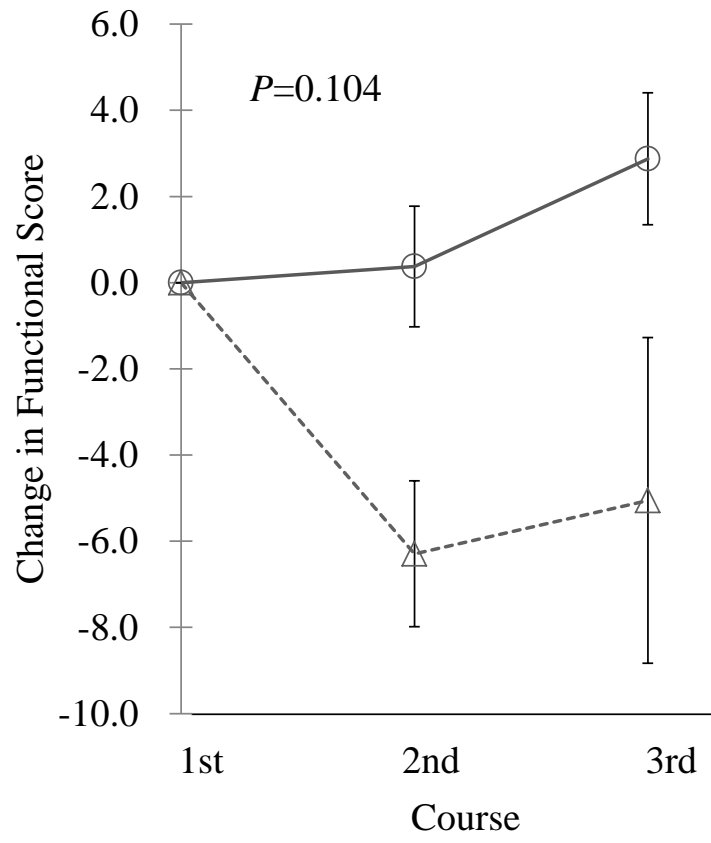

Supplement: cji-37-105-s005.pdf [file cji-37-105-s005.pdf]
